# Supplementary material
Source: PubMed Central journal article supplement (PMC4859434)
Supplement: NIHMS781583-supplement-supplemental1.pdf [file NIHMS781583-supplement-supplemental1.pdf]

### Supplemental Table I

A list of the features used in Percolator v2.04 to train Percolator support vector machines.

| #   | Feature                                 | Description                                                                                                                                      |
|-----|-----------------------------------------|--------------------------------------------------------------------------------------------------------------------------------------------------|
| 1   | Original Score                          | MS Amanda score for MS Amanda; Xcorr for SEQUEST; Ion score for Mascot.                                                                          |
| 2   | Delta Score                             | Score of the best hit minus the score of the next best non-isobaric peptide match                                                                |
| 3   | Binomial Score                          | Peptide score as described in reference 17                                                                                                       |
| 4   | Isolation Interference                  | Fraction of ion current in the isolation window not attributed to the identified precursor (%)                                                   |
| 5   | Mass                                    | Calculated monoisotopic peptide mass                                                                                                             |
| 6   | Delta mass                              | Difference between calculated and observed mass (in Dalton and ppm)                                                                              |
| 7   | Absolute delta mass                     | Absolute value of the delta mass (in Dalton and ppm)                                                                                             |
| 8   | Peptide length                          | Number of amino acids in one peptide                                                                                                             |
| 9   | Charge                                  | Precursor charge state                                                                                                                           |
| 10  | Missed cleavages                        | Number of missed cleavages                                                                                                                       |
| 11  | Log peptide matched                     | Number of candidates in the precursor mass window (log)                                                                                          |
| 12  | Log total intensity                     | Total ion current of the fragment spectrum (log)                                                                                                 |
| 13  | Fraction matched intensity              | Matched ion current divided by total ion current (%)                                                                                             |
| 14a | Fragment coverage series A, B, C        | Coverage of the N-terminal fragment ion series (%). The coverage is separately calculated for each series used and the maximum coverage is used. |
| 14b | Fragment coverage series X, Y, Z        | Coverage of the N-terminal fragment ion series (%). The coverage is separately calculated for each series used and the maximum coverage is used. |
| 15  | Log matched fragment series intensities | Ion current of matched fragment ions (log)                                                                                                       |
| 16  | Longest sequence series                 | longest consecutive run of matched fragment ions in any ion series                                                                               |
| 17  | IQR fragment delta mass                 | Interquartile range of fragment mass error (in Dalton and ppm)                                                                                   |
| 18  | Mean fragment delta mass                | Arithmetic mean fragment mass error (in Dalton and ppm)                                                                                          |
| 19  | Mean absolute fragment delta mass       | Arithmetic mean absolute fragment mass error (in Dalton and ppm)                                                                                 |
